# Supplementary material
Source: PubMed Central journal article supplement (PMC8360992)
Supplement: mmc2.pdf [file mmc2.pdf]

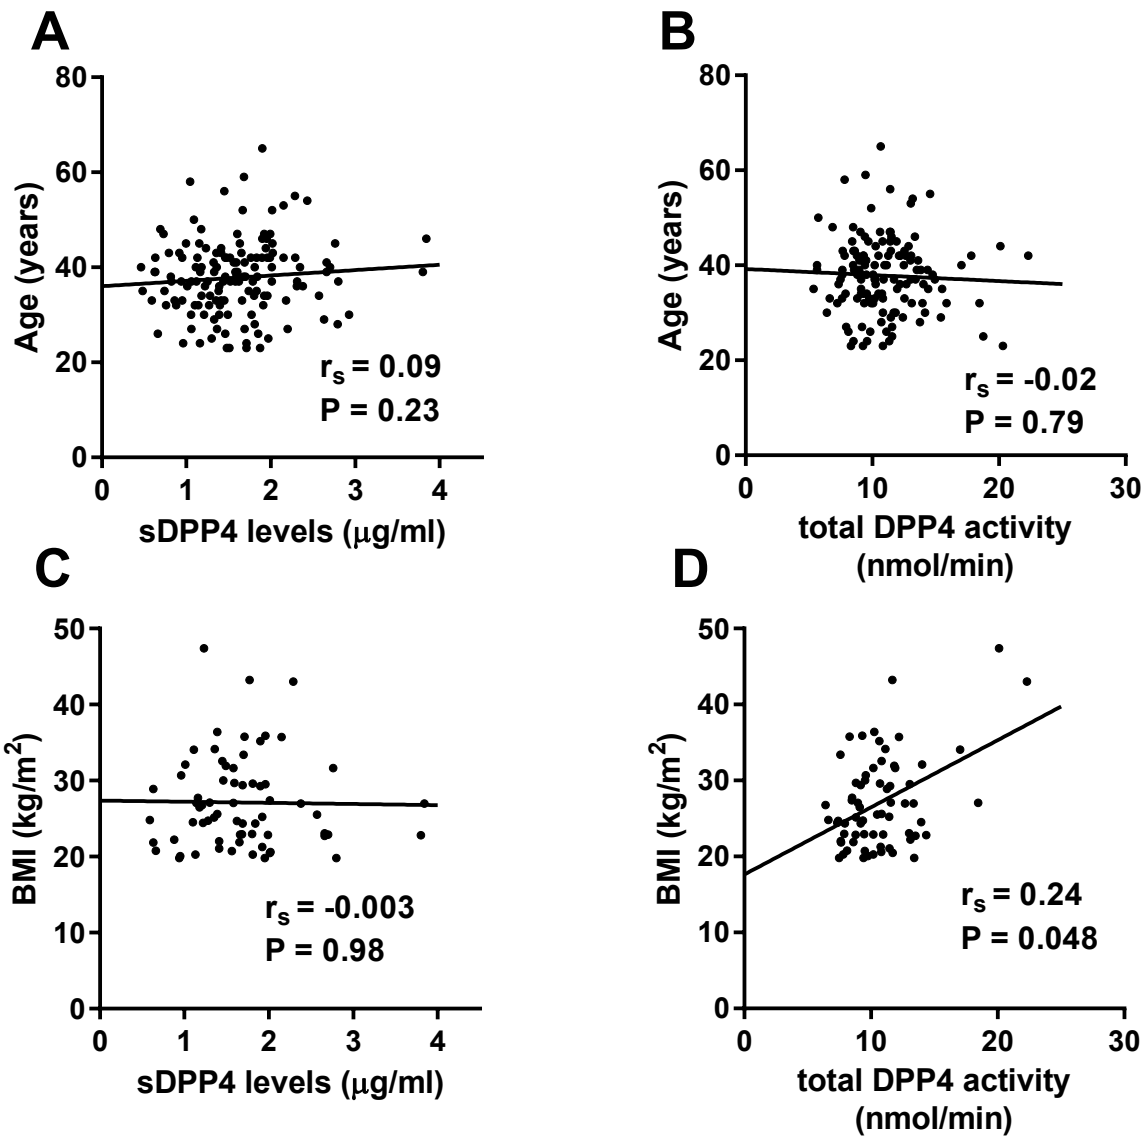

**Supplementary Fig. 1.** Relationship between sDPP4, age and body mass index (BMI). Correlation analysis was performed between age of all participants and (A) sDPP4 levels and (B) total DPP4 activity. Correlation between BMI and (C) sDPP4 levels and (D) total DPP4 activity was performed using data from the HIV-1 progressor group.
