# Supplementary material
Source: PubMed Central journal article supplement (PMC8360992)
Supplement: mmc3.pdf [file mmc3.pdf]

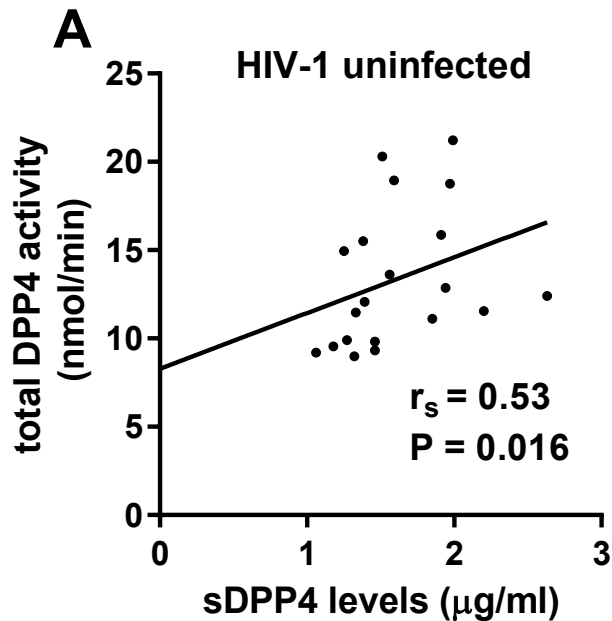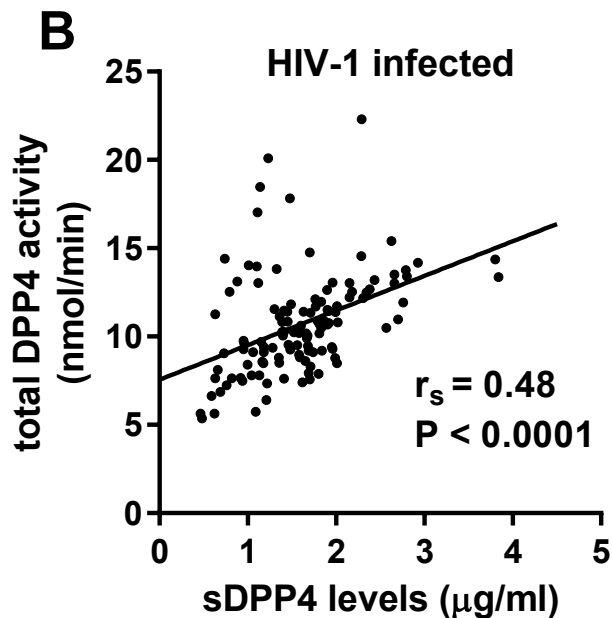

**Supplementary Fig. 2.** Relationship between sDPP4 levels and total DPP4 activity. sDPP4 levels positively correlated with total DPP4 activity in both (A) HIV-1 uninfected and (B) HIV-1 infected groups.
